# Supplementary material for: Zipper head mechanism of telomere synthesis by human telomerase
Source: Springer Nature journal article supplement (doi:10.1038/s41422-021-00586-7), 2021-11-15
Supplement: 41422_2021_586_MOESM1_ESM.pdf [file 41422_2021_586_MOESM1_ESM.pdf]

**a**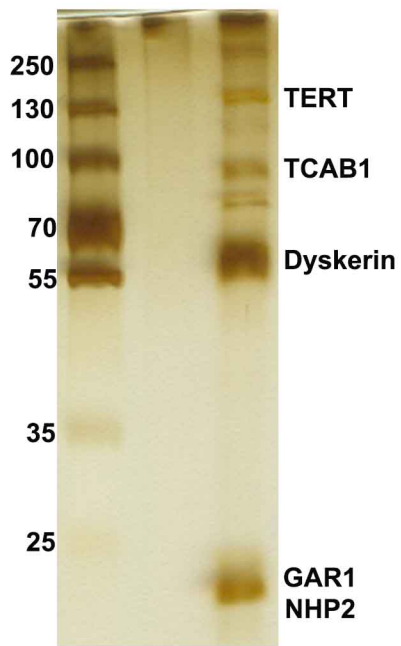**b**

| Uniprot Acc.No. | <i>H. sapiens</i> protein | Peptide spectrum matches | Unique peptides |
|-----------------|---------------------------|--------------------------|-----------------|
| O14746          | TERT                      | 224                      | 64              |
| O60832          | Dyskerin                  | 146                      | 41              |
| Q9BUR4          | TCAB1                     | 95                       | 22              |
| Q9NY12          | GAR1                      | 30                       | 8               |
| Q9NX24          | NHP2                      | 26                       | 9               |
| Q9NPE3          | NOP10                     | 13                       | 7               |
| O60814          | H2B 1-K                   | 15                       | 7               |
| P06899          | H2B 1-J                   | 12                       | 6               |
| Q6FI13          | H2A 2-A                   | 12                       | 5               |
| ⋮               | ⋮                         | ⋮                        | ⋮               |
| P62805          | H4                        | 5                        | 5               |
| P68431          | H3.1                      | 2                        | 2               |

**c**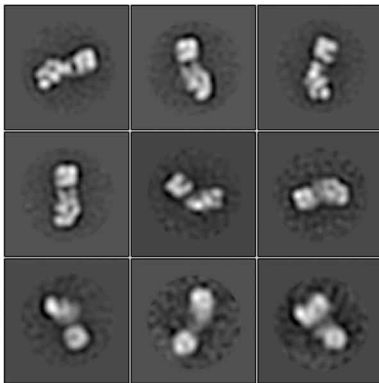**d**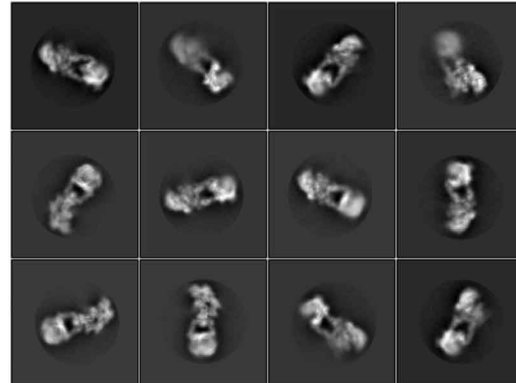**e**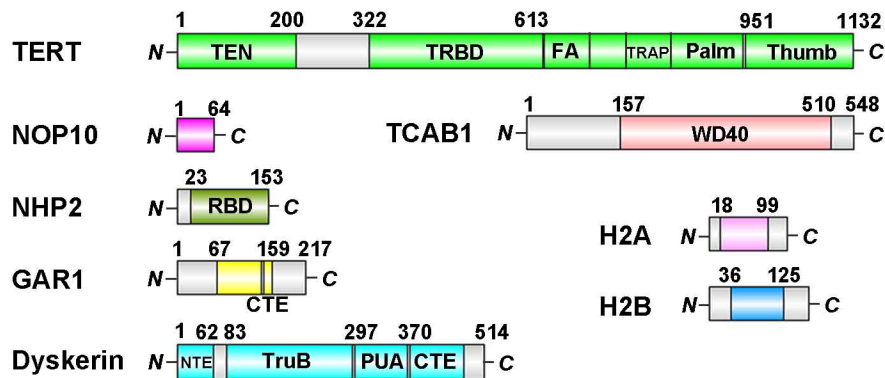

**Supplementary information, Fig. S1 Biochemical and biophysical evaluation of purified human telomerase holoenzyme.** **a** Silver-stained SDS-PAGE gel of the purified telomerase holoenzyme complex. **b** Mass spectrometry analysis of the purified telomerase holoenzyme complex. **c** Negative-stained 2D class averages of the purified telomerase holoenzyme complex. **d** Representative 2D class averages of telomerase particles from cryo-EM experiments. **e** Domain organizations of human telomerase protein components.
