# Supplementary material for: Zipper head mechanism of telomere synthesis by human telomerase
Source: Springer Nature journal article supplement (doi:10.1038/s41422-021-00586-7), 2021-11-15
Supplement: 41422_2021_586_MOESM2_ESM.pdf [file 41422_2021_586_MOESM2_ESM.pdf]

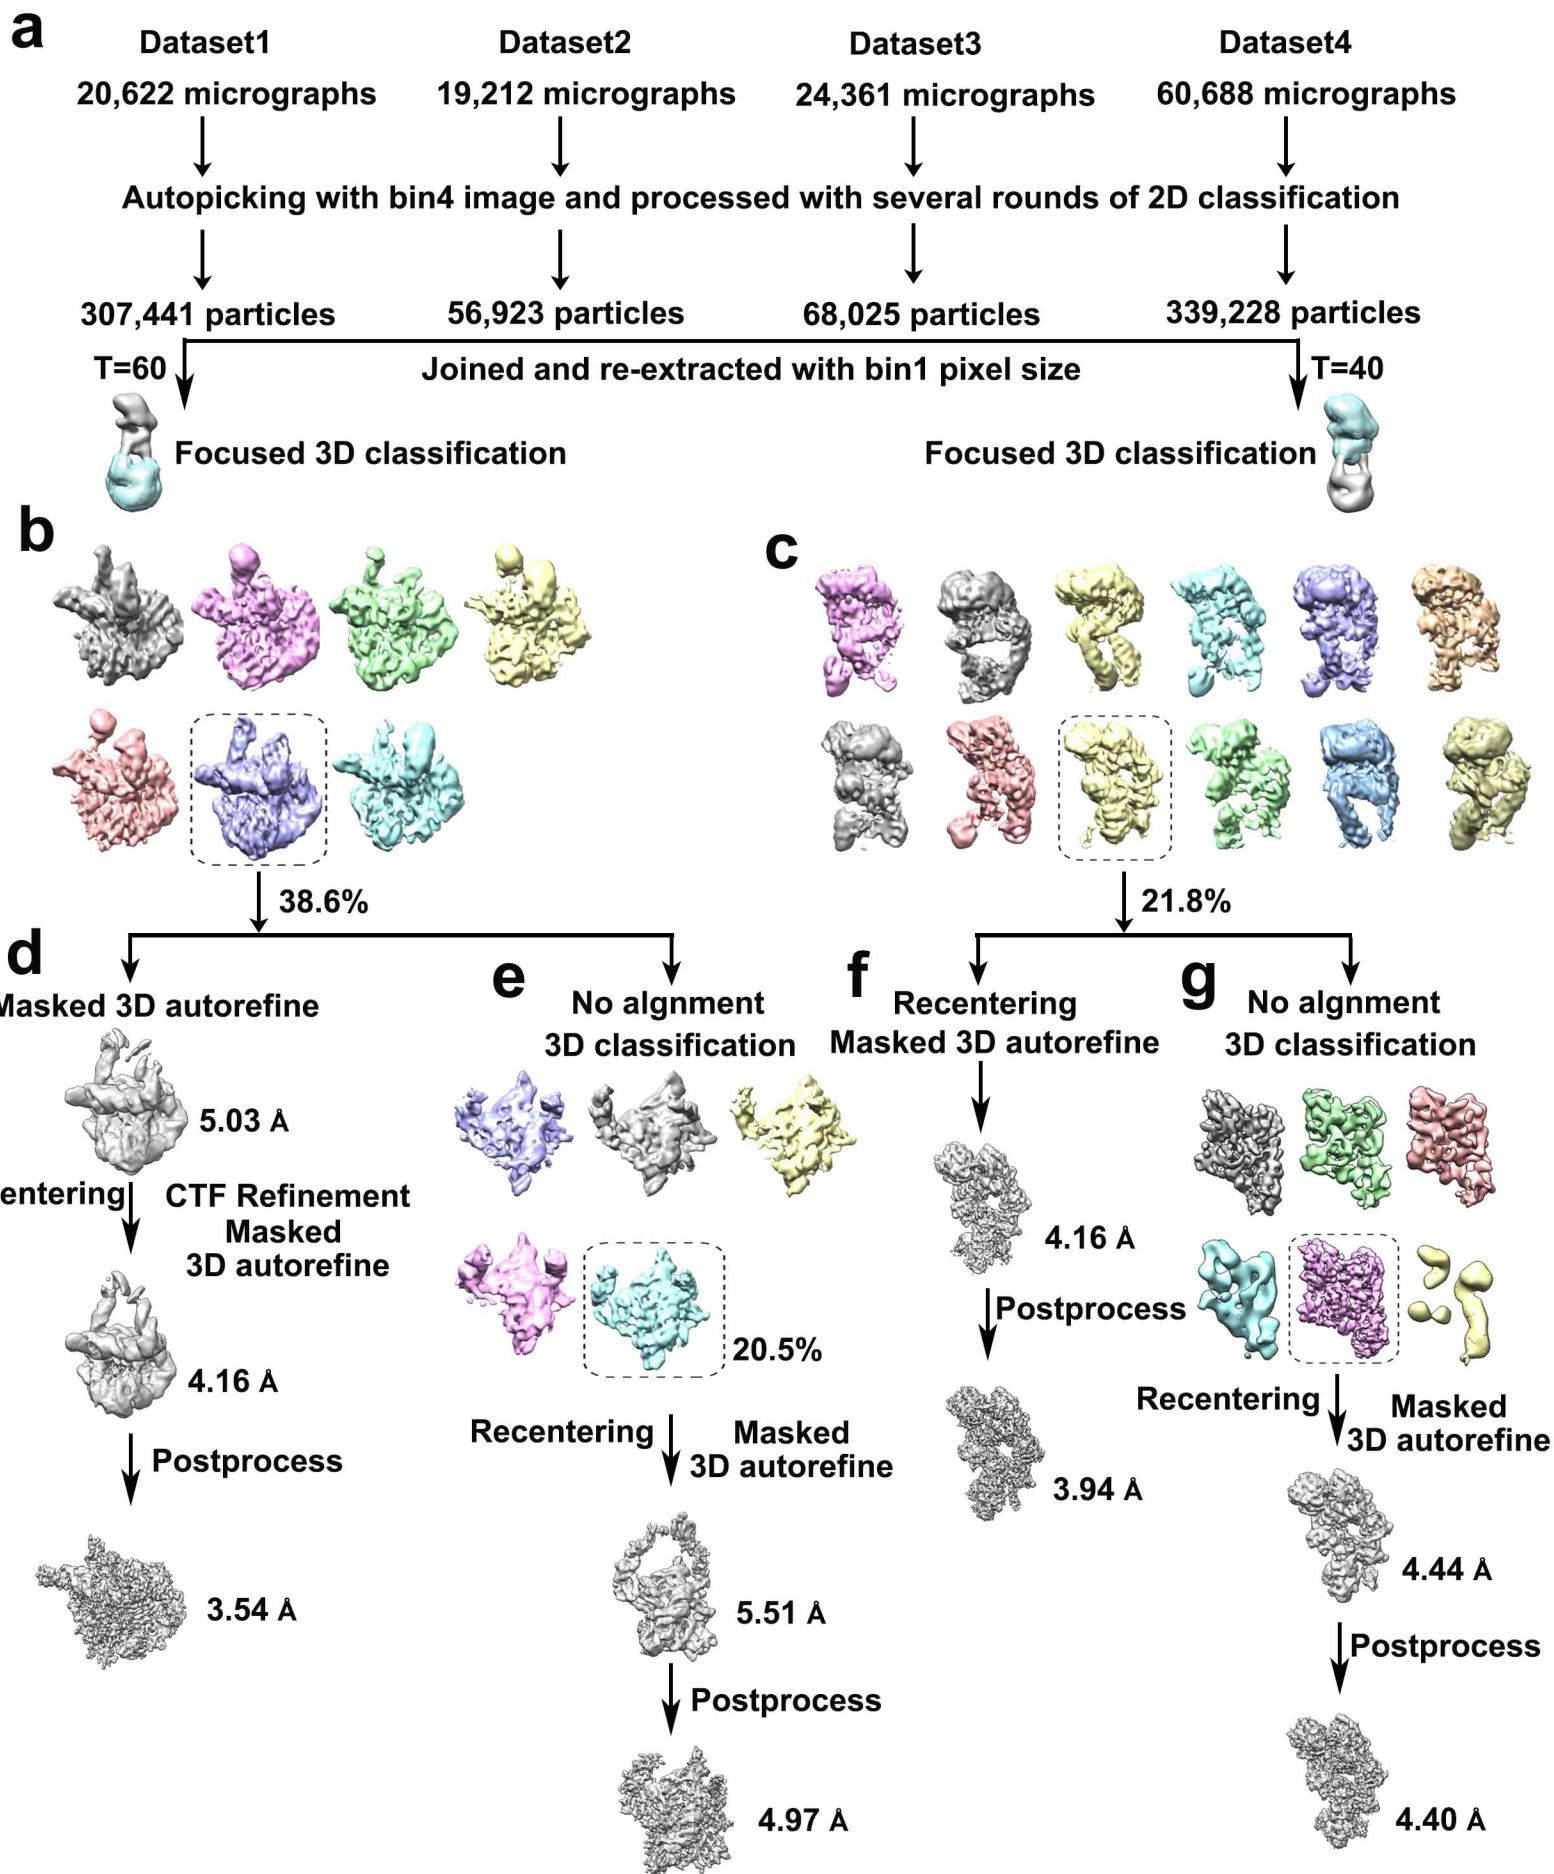

**Supplementary information, Fig. S2 Cryo-EM data processing workflow of human telomerase holoenzyme. a** All datasets and particles used in this paper. **b** Masked 3D classification for the catalytic core. **c** Masked 3D classification for the biogenesis domain. **d** Data processing flowchart for the catalytic core. **e** Data processing flowchart for the catalytic core focusing on the H2A/H2B heterodimer. **f** Data processing flowchart for the biogenesis domain. **g** Data processing flowchart for the biogenesis domain focusing on stems p7-p8a of the hTR RNA.
