# Supplementary material for: Zipper head mechanism of telomere synthesis by human telomerase
Source: Springer Nature journal article supplement (doi:10.1038/s41422-021-00586-7), 2021-11-15
Supplement: 41422_2021_586_MOESM3_ESM.pdf [file 41422_2021_586_MOESM3_ESM.pdf]

**a**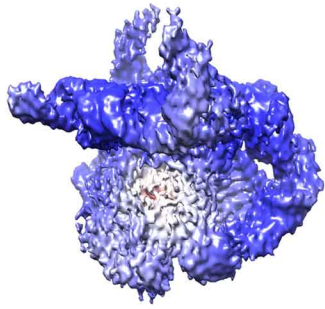**e**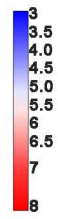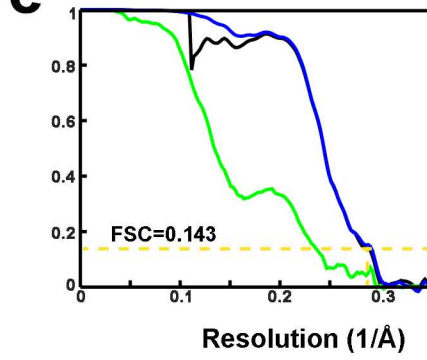

— Masked map  
— Corrected map  
— Unmasked map

**b**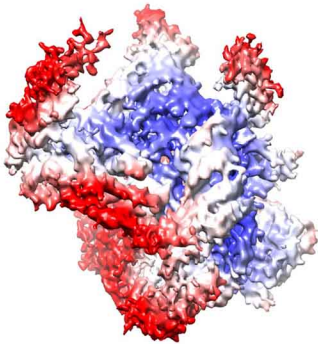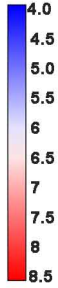**f**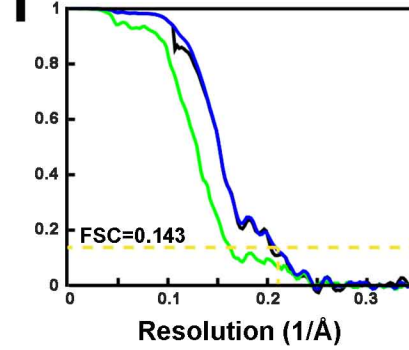

— Masked map  
— Corrected map  
— Unmasked map

**c**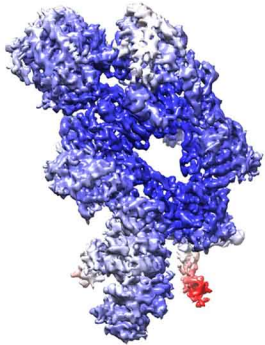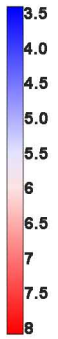**g**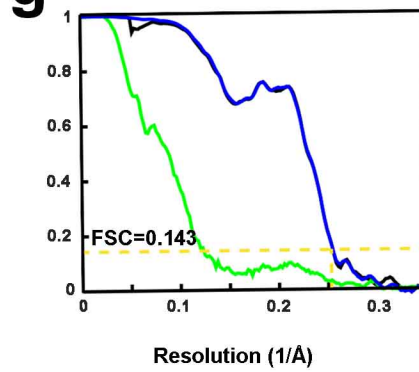

— Masked map  
— Corrected map  
— Unmasked map

**d**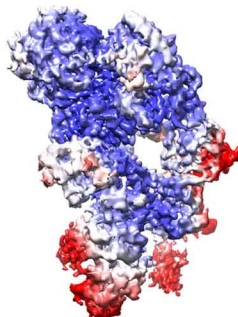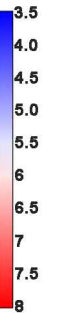**h**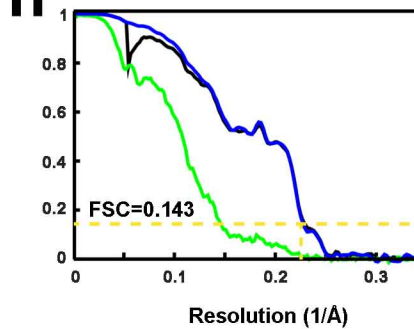

— Masked map  
— Corrected map  
— Unmasked map

**Supplementary information, Fig. S3 Local resolution estimations of human telomerase holoenzyme. a-d** Local resolutions estimated by RELION 3.1 for the four reconstructed maps in Figure S2. **e-f** Gold-standard Fourier Shell Correlation (FSC) curves of the four reconstructed maps, respectively. Resolutions were estimated at FSC = 0.143.
