# Supplementary material for: Zipper head mechanism of telomere synthesis by human telomerase
Source: Springer Nature journal article supplement (doi:10.1038/s41422-021-00586-7), 2021-11-15
Supplement: 41422_2021_586_MOESM4_ESM.pdf [file 41422_2021_586_MOESM4_ESM.pdf]

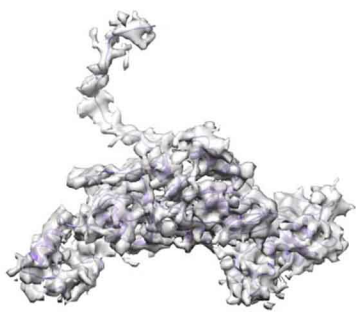

**Dyskerin\_1**

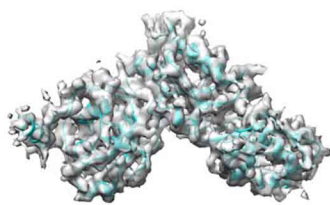

**Dyskerin\_2**

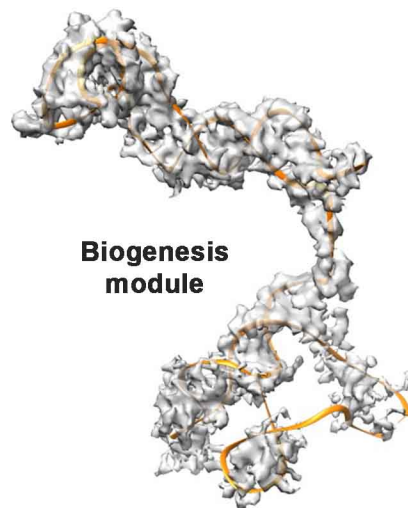

**Biogenesis  
module**

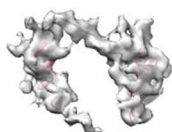

**NOP10\_1**

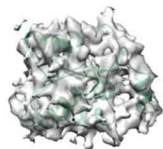

**NHP2\_1**

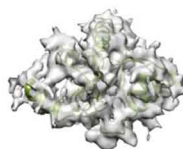

**NHP2\_2**

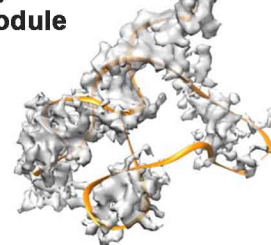

**hTR**

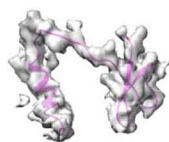

**NOP10\_2**

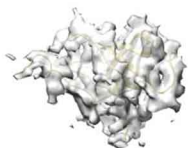

**GAR1\_2**

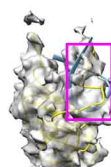

**GAR1\_1**

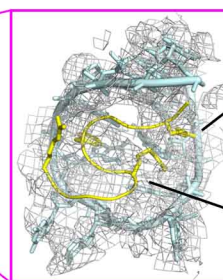

**5' tail of hTR**

**Arginine-rich  
motif**

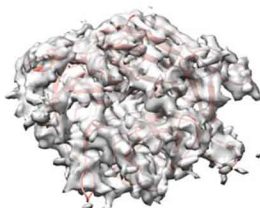

**TCAB1**

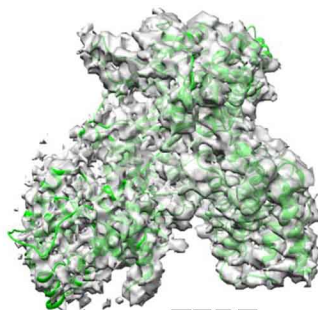

**TERT**

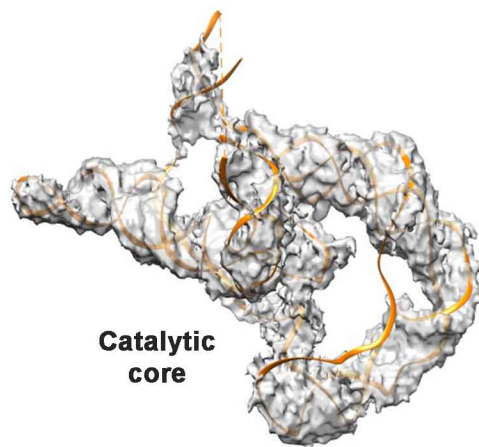

**Catalytic  
core**

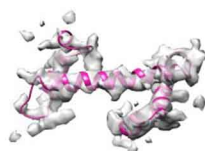

**H2A**

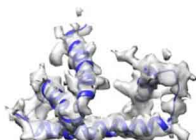

**H2B**

**hTR**

**Supplementary information, Fig. S4 Representative cryo-EM density maps for the RNA and protein components of human telomerase.** A gallery of representative cryo-EM density maps for all components of human telomerase.
