# Supplementary material for: Zipper head mechanism of telomere synthesis by human telomerase
Source: Springer Nature journal article supplement (doi:10.1038/s41422-021-00586-7), 2021-11-15
Supplement: 41422_2021_586_MOESM5_ESM.pdf [file 41422_2021_586_MOESM5_ESM.pdf]

**a**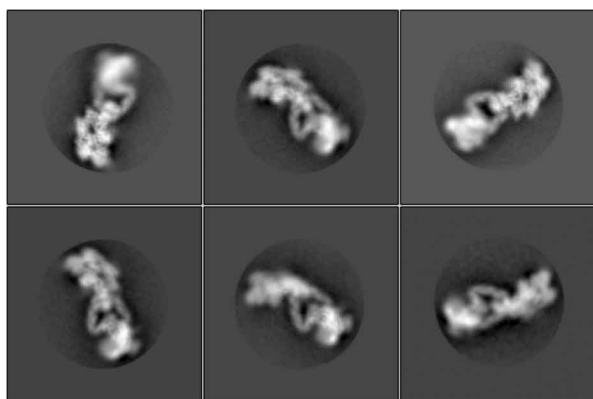**Without H2A-H2B**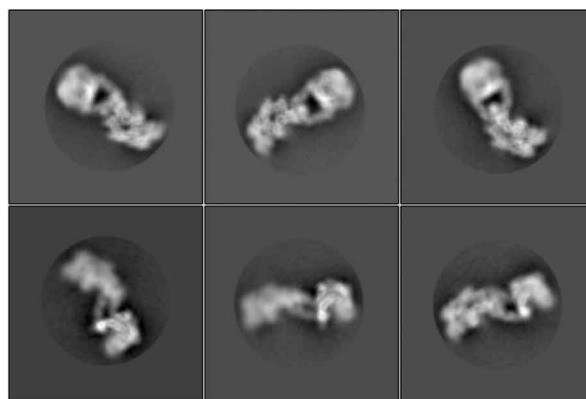**With H2A-H2B****b**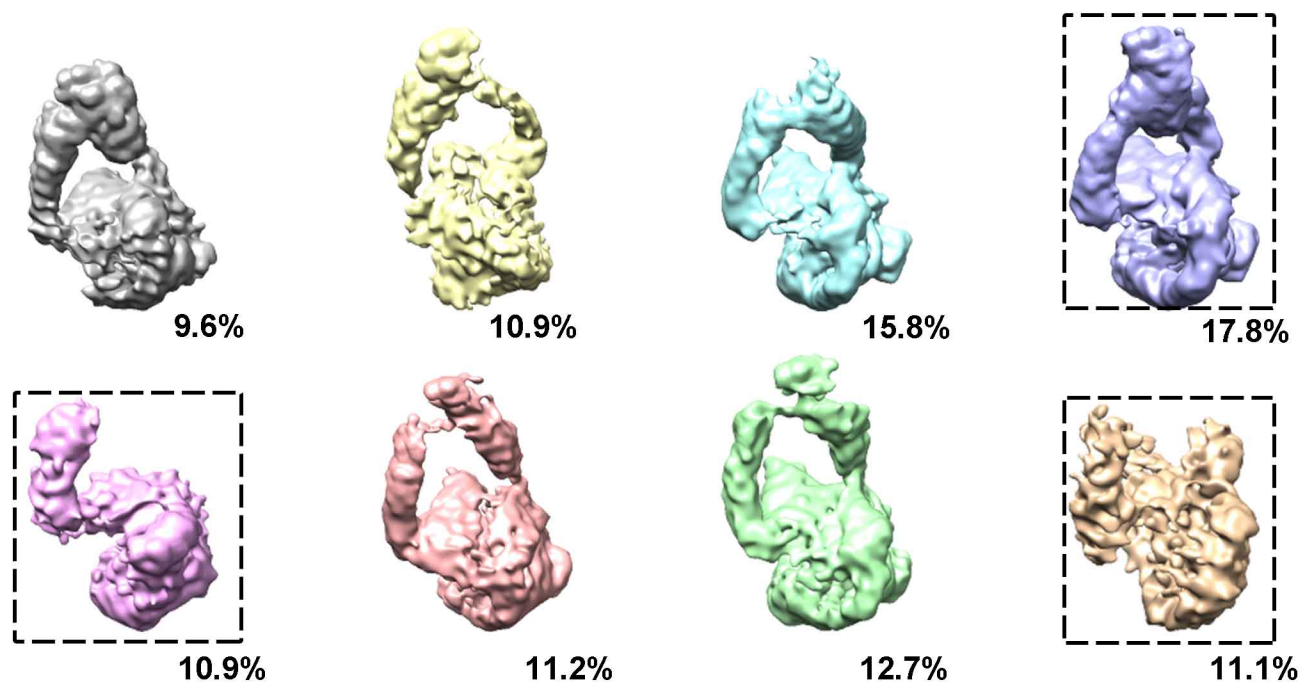

**Supplementary information, Fig. S5 2D and 3D image classification of the cryo-EM data processing for the catalytic core. a** Selected reference-free 2D class averages of the human telomerase particles with or without the H2A-H2B heterodimer.

**b** Masked 3D classification for the catalytic core. Particles without the H2A-H2B heterodimer are boxed with dashed rectangles.
