# Supplementary material for: Zipper head mechanism of telomere synthesis by human telomerase
Source: Springer Nature journal article supplement (doi:10.1038/s41422-021-00586-7), 2021-11-15
Supplement: 41422_2021_586_MOESM7_ESM.pdf [file 41422_2021_586_MOESM7_ESM.pdf]

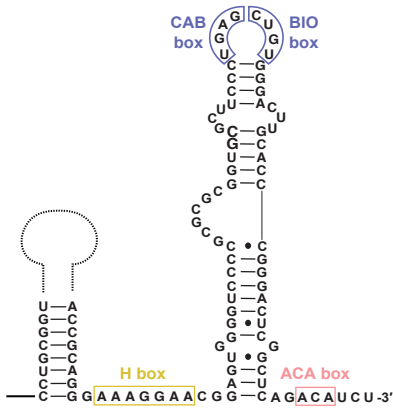

**Cattle (*Bos taurus*)**

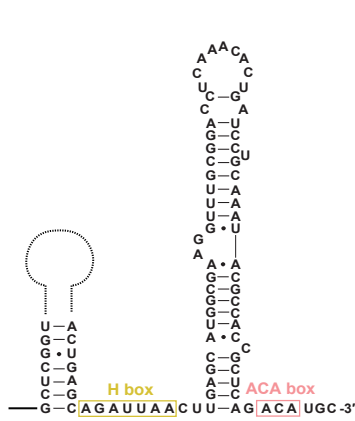

**Zebrafish (*Dania rerio*)**

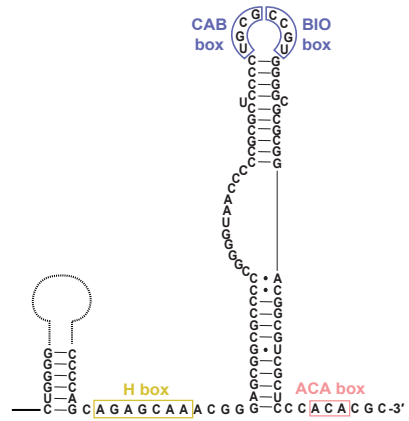

**Chicken (*Gallus gallus*)**

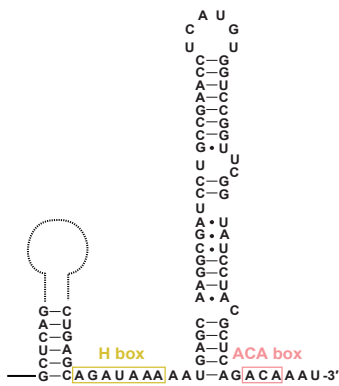

**Medaka (*Oryzias latipes*)**

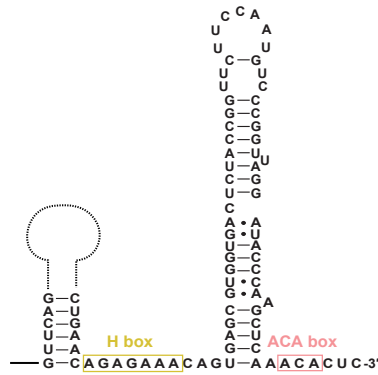

**Fugu (*Takifugu rubripes*)**

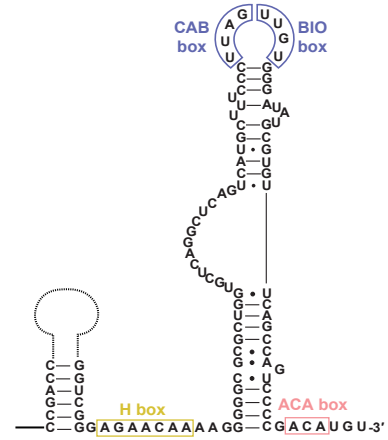

**African clawed frog (*Xenopus laevis*)**

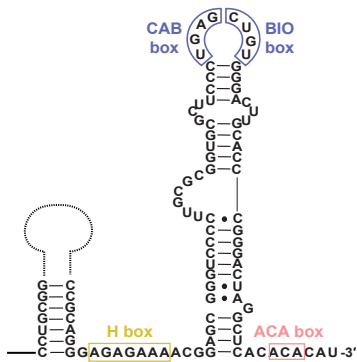

**Raccoon (*Procyon lotor*)**

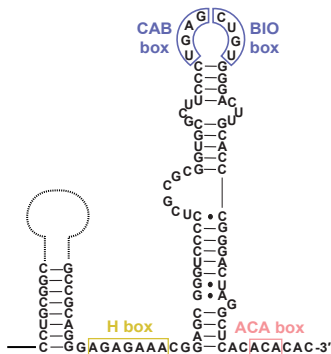

**Domestic ferret (*Mustela putorius furo*)**

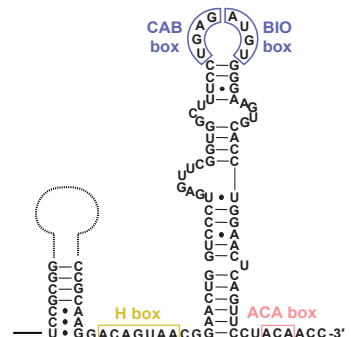

**Norway Rat (*Rattus norvegicus*)**

**Supplementary information, Fig. S7 Schematic diagrams of the RNA secondary structures of the biogenesis domains in vertebrates.** The conserved CAB, H and ACA boxes are highlighted in purple, green and blue boxes.
