# Supplementary material for: Zipper head mechanism of telomere synthesis by human telomerase
Source: Springer Nature journal article supplement (doi:10.1038/s41422-021-00586-7), 2021-11-15
Supplement: 41422_2021_586_MOESM10_ESM.pdf [file 41422_2021_586_MOESM10_ESM.pdf]

**a**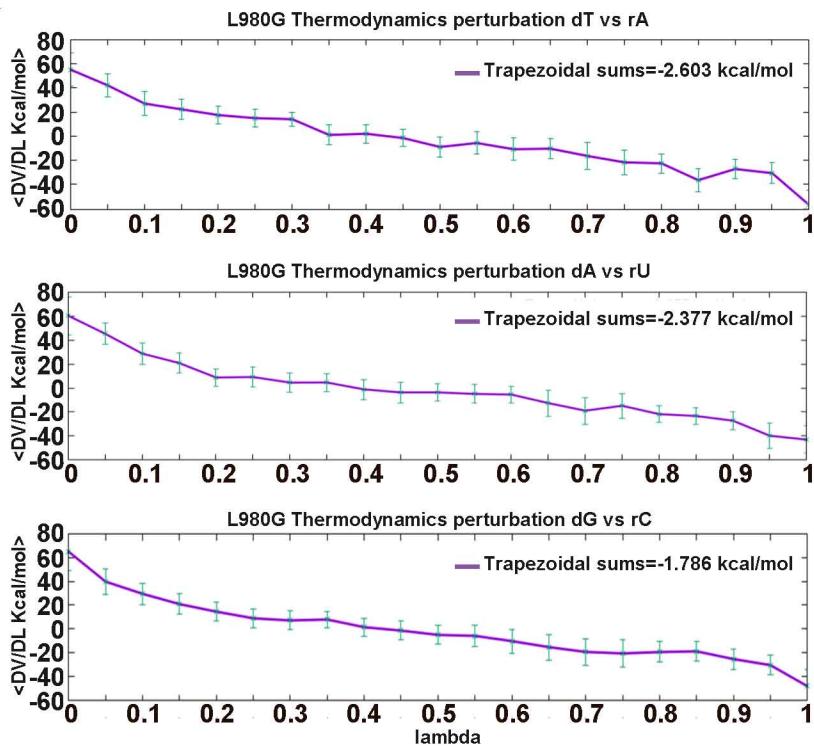**b**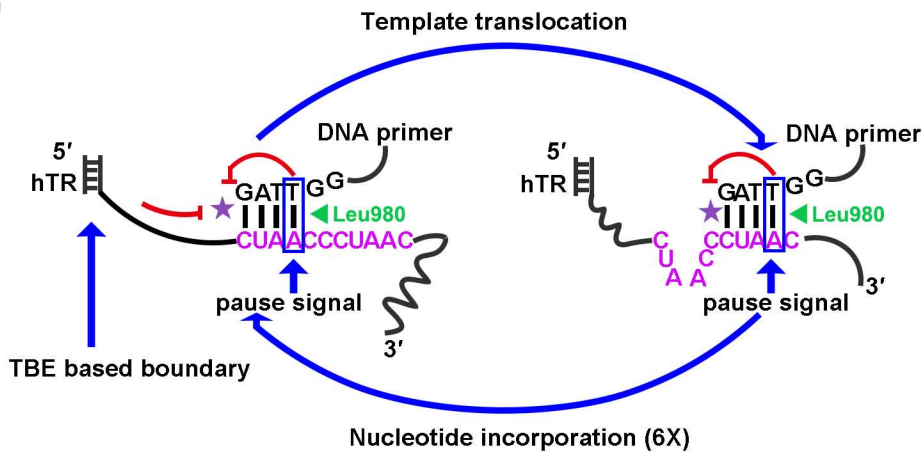**c**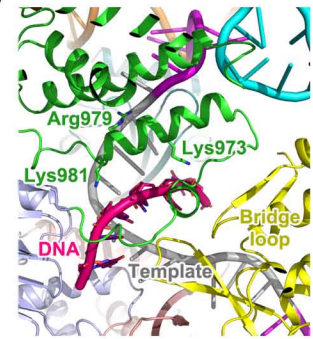**d**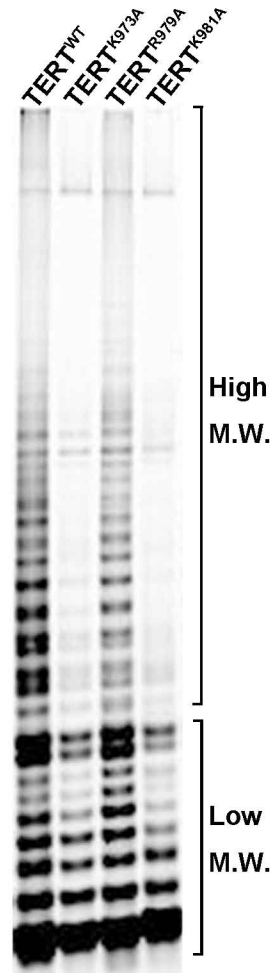

**Supplementary information, Fig. S10 Biochemical and Computational analysis of zipper head-based template boundary signal.** **a** Comparison of  $\langle dV/d\lambda \rangle_\lambda$  values for the alchemical transformation of L980G facing with dT-A, dA-U and dG-C base pairs at position 5, respectively. **b** Coincidence of the zipper-head-based template boundary (blue box) with the physical constrain of TBE stem P1b. Human telomerase uses the rA:dT base pair (blue box) as a pausing signal after completion of each cycle of telomeric repeat addition, referred to as a sequence-based template boundary signal. During a full extension cycle of a telomere repeat, the zipper head Leu980 would experience an unfavorable dG-to-dT transition at position 5, suggestive of an important role of Leu980 in determining the sequence-based template boundary signal. The zipper-head-based template boundary coordinates with TBE-defined boundary to ensure template translocation at the end of each telomere extension cycle to facilitate RAP. The catalytic center and Leu980 are denoted with purple star and green triangle, respectively. **c** Closeup view of the thumb helix and bridge loop in the catalytic cavity. **d** Telomerase activity of purified human telomerase reconstituted from U2OS cells over-expressing Flag-tagged WT and mutant TERT proteins.
