# Supplementary material for: Zipper head mechanism of telomere synthesis by human telomerase
Source: Springer Nature journal article supplement (doi:10.1038/s41422-021-00586-7), 2021-11-15
Supplement: 41422_2021_586_MOESM11_ESM.pdf [file 41422_2021_586_MOESM11_ESM.pdf]

**a**

|                      |                         | 960                     | 970                    | 980                     | 990               | 1000               |                   |                 |
|----------------------|-------------------------|-------------------------|------------------------|-------------------------|-------------------|--------------------|-------------------|-----------------|
| Deuterostomia        | Vertebrates             | <i>H. sapiens</i>       | TSIRASLTFN.RGFK.AGRN.  | MRRKLLFGVLR             | KCHSLF            | LDLQVNSLQT         | VCTNIYKIFLLQA     |                 |
|                      |                         | <i>M. auratus</i>       | TSIKASLTFQ.RTFK.AGRN.  | MRQKLLAVLR              | KCHSLF            | LDLQVNSLQT         | VCIINVYKIFLLQA    |                 |
|                      |                         | <i>M. musculus</i>      | TSIKTSLTFQ.SVFK.AGKT.  | MRRKLLSVLR              | KCHGLF            | LDLQVNSLQT         | VCIINVYKIFLLQA    |                 |
|                      |                         | <i>R. norvegicus</i>    | TSIKMSLTFQ.GVSR.AGKT.  | MRYKLLSVLR              | KCHGLF            | LDLQVNSLQT         | VCIINVYKIFLLQA    |                 |
|                      |                         | <i>C. familiaris</i>    | TSIRASLTFQ.QGAK.PGRN.  | MRRKLLAVLR              | KCCALF            | LDLQVNGIHT         | VYMNVIYKIFLLQA    |                 |
|                      |                         | <i>B. taurus</i>        | TSIRASLTFQ.QGFK.PGRN.  | MRRKLLAVLR              | KCHGLF            | LDLQVNSLQT         | VYMNVIYKIFLLQA    |                 |
|                      |                         | <i>C. japonica</i>      | TSIRSLSLTFN.SSRI.AGKN. | MKCKLTAVALK             | KCHPLL            | LDLQVNSLQT         | VLIINVYKIFLLQA    |                 |
|                      |                         | <i>G. gallus</i>        | TSIRSLSLTFN.SSRI.AGKN. | MKCKLTAVALK             | KCHPLL            | LDLQVNSLQT         | VLIINVYKIFLLQA    |                 |
|                      |                         | <i>X. laevis</i>        | TSIRSMTLTFC.HSSA.AGKY. | MKCKLIRVLR              | KCHSLF            | LDLQVNSLRT         | VCIINVYKIFLLQA    |                 |
|                      |                         | <i>O. latipes</i>       | LSLRYSLTLG.SAHS.AGQQ.  | MRRKLLMSILR             | KCHPLF            | LDLQVNSLRT         | VYMNVIYKIFLLQA    |                 |
|                      |                         | <i>O. melastigma</i>    | LSLRYSLTLG.SAHS.AGQQ.  | MRRKLLMSILR             | KCHPLF            | LDLQVNSLRT         | VYMNVIYKIFLLQA    |                 |
|                      |                         | <i>E. coioides</i>      | LSLRYSLTLG.SAHS.AGQQ.  | MRRKLLMSILR             | KCHPLF            | LDLQVNSLRT         | VYMNVIYKIFLLQA    |                 |
|                      |                         | <i>T. rubripes</i>      | LSLRYSLTLG.SAHS.AGQQ.  | MRRKLLMSILR             | KCHPLF            | LDLQVNSLRT         | VYMNVIYKIFLLQA    |                 |
|                      |                         | <i>D. rerio</i>         | LSLRYSLTLG.SAHS.AGQQ.  | MRRKLLMSILR             | KCHPLF            | LDLQVNSLRT         | VYMNVIYKIFLLQA    |                 |
|                      |                         | Chordata                | <i>P. marinus</i>      | VQVSWTMSLFC.FASQ.PGHT.  | MRTKLLMHVLR       | KCQPIL             | LDLQVNSLRT        | VYMNVIYKIFLLQA  |
|                      |                         |                         | <i>S. kowalevskii</i>  | IDMADTFTMD.LTKQ.PGKS.   | LINIKMKQTVSL      | KCHPIF             | MDGQVNSLRT        | VYMNVIYKIFLLQA  |
|                      |                         | Echinodermata           | <i>A. rubens</i>       | VSISSHMTIVN.FTDK.DVLPK. | VKTQVLRQLLR       | KCNKFF             | LDPEINFP          | PEIKRNCYEFFLLSA |
| <i>P. miniata</i>    | VSISSHMTIVN.FTDK.DVLPK. |                         | VKTQVLRQLLR            | KCNKFF                  | LDPEINFP          | PEIKRNCYEFFLLSA    |                   |                 |
| <i>A. planci</i>     | VSISSHMTIVN.FTDK.DVLPK. |                         | VKTQVLRQLLR            | KCNKFF                  | LDPEINFP          | PEIKRNCYEFFLLSA    |                   |                 |
| Protostomia          | Mollusca                | <i>P. diffusa</i>       | LGISDTSISFD.GCHK.PGET. | IKKMLMSLTF              | RSHQIFFD          | PLNINS             | EERILLNAFCITFFFLA |                 |
|                      |                         | <i>P. canaliculata</i>  | LGISDTSISFD.GCHK.PGET. | IKKMLMSLTF              | RSHQIFFD          | PLNINS             | EERILLNAFCITFFFLA |                 |
|                      |                         | <i>C. gigas</i>         | IRMRHTLTVS.VSMN.PGRT.  | MKRKLLMSLRF             | KCHAIFFD          | TELSNS             | TEVCSVNCRLLLLTA   |                 |
|                      |                         | <i>C. virginica</i>     | IRMRHTLTVS.VSMN.PGRT.  | MKRKLLMSLRF             | KCHAIFFD          | TELSNS             | TEVCSVNCRLLLLTA   |                 |
|                      |                         | <i>M. yessoensis</i>    | ICVADTMSFD.LSRD.PLMT.  | LKHKLLNALKP             | KSHVIYMD          | TELSNT             | TEIVVTNIFKIFVFLNA |                 |
|                      | Annelida                | <i>H. robusta</i>       | LSVKYTMAS.FSNH.PGSA.   | IEKLLFSVRS              | KCNISYFD          | TTYSNS             | VNTIFLNVYKIFLLLA  |                 |
| Basal metazoa        | Placozoa                | <i>T. adhaerens</i>     | IRISECMTIN.ISNN.AGQT.  | MRAKMLQVVRM             | LCQIITLD          | PEMNSKLT           | IGINIFDKLQQLIM    |                 |
|                      |                         | <i>A. queenslandica</i> | ..IRDCLTIS.NSSIVPAHS.  | LSIQQLIQALS             | KCVPHL            | LDLQVNSLRT         | VYMNVIYKIFLLQA    |                 |
|                      | Porifera                | <i>A. tenebrosa</i>     | KH.RN.TVLRN.LHYH.PGRS. | LLEKLLXYSLLN            | KSHPLL            | LDLQVNSLRT         | VYMNVIYKIFLLQA    |                 |
|                      |                         | <i>M. millepora</i>     | IQLRD.TLSVS.LDAH.PGKA. | LRRKLLCSVRF             | KCHPLL            | LDLQVNSLRT         | VYMNVIYKIFLLQA    |                 |
|                      | Cnidaria                | <i>E. diaphana</i>      | VNPRKIFPKT.RQCN.NSQV.  | LSSKLLSFSARN            | KCHPLL            | LDLQVNSLRT         | VYMNVIYKIFLLQA    |                 |
|                      |                         | <i>P. damicornis</i>    | SLLRD.TLTVS.LDAH.PGEA. | LSSKLLSFSARN            | KCHPLL            | LDLQVNSLRT         | VYMNVIYKIFLLQA    |                 |
|                      |                         | <i>S. pistillata</i>    | SLLRD.TLTVS.LDAH.PGEA. | LSSKLLSFSARN            | KCHPLL            | LDLQVNSLRT         | VYMNVIYKIFLLQA    |                 |
|                      |                         | <i>O. faveolata</i>     | LLLRD.TLTVS.LDAH.PGEA. | LRRKLLSFSARN            | KCHPLL            | LDLQVNSLRT         | VYMNVIYKIFLLQA    |                 |
|                      |                         | <i>N. vectensis</i>     | GVEDSI.QGP.MASH.TGHG.  | ISTKLLKFSLR             | KCVPLL            | LDLQVNSLRT         | VYMNVIYKIFLLQA    |                 |
|                      |                         | Plants                  | <i>A. thaliana</i>     | GHISSTFSVA.WQNK.PVRN.   | LROKLLCYFLVF      | KCHPIFFD           | SNINS             | GEIVRLNIYQIFLLA |
|                      |                         |                         | <i>M. esculenta</i>    | KHLRS.TLTVS.WQNK.PGHR.  | LKTKLLCDFMRP      | KCHPIFFD           | SNINS             | GSVVRNIYQIFLLA  |
|                      | <i>N. tabacum</i>       |                         | FPLSS.TLTVG.WLNK.PGRD. | LKVKLLCYFLVF            | KCHPIFFD          | SNINS              | AAVVRNIYQIFLLA    |                 |
|                      | <i>B. vulgaris</i>      |                         | DHLSS.TLTVS.WQNK.PGRD. | LKAKLLRAYMRP            | KCHPIFFD          | SNINS              | SPVVRNIYQIFLLA    |                 |
| <i>A. trichopoda</i> | THISS.TVTVW.RQAK.PGSH.  | LKGGKLDYMRP             | KCHALFYD               | SNINS                   | PATVRLNAYQIFLLA   |                    |                   |                 |
| Ciliates             | <i>E. aediculatus</i>   | G.ILC.TLNLNMQTKK.ASMW.  | LKKKLLKSFLLM           | NITHYFRK                | TITTE             | DFANKTLNKLFISSGGY  |                   |                 |
|                      | <i>E. crassus</i>       | G.ILC.TLNLNMQTKK.ASMW.  | LKKKLLKSFLLM           | NITHYFRK                | TITTE             | DFANKTLNKLFISSGGY  |                   |                 |
|                      | <i>O. trifallax</i>     | G.ILC.TLNLNMQTKK.ASMW.  | LKKKLLKSFLLM           | NITHYFRK                | TITTE             | DFANKTLNKLFISSGGY  |                   |                 |
|                      | <i>P. caudatum</i>      | TKFQYQINVNLPKV.KTYY.    | IKSKLLKSLILN           | QKFFFN                  | SKLNDKPTM         | IKVLFVHSGLV        |                   |                 |
|                      | <i>P. tetraurelia</i>   | SKFNSQINVNLPKRI.NSYF.   | FKAKLLKSLMLN           | QKFFFN                  | NPKINDQPTL        | IKIAKTFIHAGLI      |                   |                 |
|                      | <i>T. thermophila</i>   | QBINQ.TINVAISIKN.LKSQ.  | LKNKLLRSLFLN           | QLIDYF                  | NPNINS            | SFEGLCRQLYHHSKATVM |                   |                 |
| Fungi                | <i>A. clavatus</i>      | ATLASLSTVE.SARA.PGRS.   | LHRKMLSAFKL            | QMHPMYLD                | TOHNS             | LSAVLSNLYASFVTA    |                   |                 |
|                      | <i>A. fumigatus</i>     | GTISSSLTVE.FTRA.PGRS.   | LHRKMLSAFKL            | QMHPMYLD                | TOHNS             | LSAVLSNLYASFVTA    |                   |                 |
|                      | <i>C. albicans</i>      | SGSISLVTN.FRTF...KT.    | LVKYLKTFYQL            | NLEGLD                  | DCSPGV            | LENVNLNMYQSLRLVL   |                   |                 |
|                      | <i>N. fischeri</i>      | ATISSSLTVE.STRA.PGRS.   | LHRKMLSAFKL            | QMHPMYLD                | TOHNS             | LSAVLSNLYASFVTA    |                   |                 |
|                      | <i>K. lactis</i>        | ...NVLGTV.LGSS...KQ.    | LYNKLLWIFEM            | RLSYNM                  | LDLQVNSLRT        | VYMNVIYKIFLLQA     |                   |                 |
|                      | <i>A. nidulans</i>      | VALSDSLSID.STRT.PGRS.   | FYRKVLASIKQ            | SMHPMYLD                | STHNS             | LPAVLLNVYKSFVTA    |                   |                 |
|                      | <i>E. cuniculi</i>      | ADPYLPFSIA.HSSTKPGA.    | LRSRMKLLQNR            | RMSRIY                  | IDPN.NK.          | KAYENIYDTFFLFYQ    |                   |                 |
|                      | <i>S. bayanus</i>       | SNMTNMFNVR.SNSSK...I.   | IFRRLTSLFNT            | RVSYKT                  | INYNLNS           | TATVLMQIYIVKKNIS   |                   |                 |
|                      | <i>S. cerevisiae</i>    | SSMTNMFNIR.SKSSK...G.   | IFRSLIALFNT            | RISYKT                  | IDTNLNS           | TNTVLMQIDHVVKNIS   |                   |                 |
|                      | <i>S. kudriavzevii</i>  | SSMTNMFNIR.SNSSK...K.   | IFRRLTSLFNT            | RISYKT                  | ADSNLNS           | ITTVLMQIYIVKKNIS   |                   |                 |
|                      | <i>S. mikatae</i>       | SSMTNMFNIR.SNSSK...K.   | IFRSLIALFNT            | RISYKT                  | IDPNLNS           | ITTVLMQIYIVKKNIS   |                   |                 |
|                      | <i>S. paradoxus</i>     | SSMTNMFNIR.SNSSK...R.   | IFRSLIALFNT            | RISYKT                  | VDSNLNS           | TTTVLMQIYIVKKNIS   |                   |                 |
| <i>A. gossypii</i>   | KETYNKIQSY.LSSA...NK.   | LYKLLRWLFE              | RMAYEIT                | QPTYNS                  | WEAVIVTHEVQATINLA |                    |                   |                 |
| <i>S. pombe</i>      | .ALFNSTLVE.LTKH.MGKS.   | FFYKILRSLSLA            | SFAQVF                 | IDITNS                  | KFNSCCNIYRLLGYSMC |                    |                   |                 |

**b**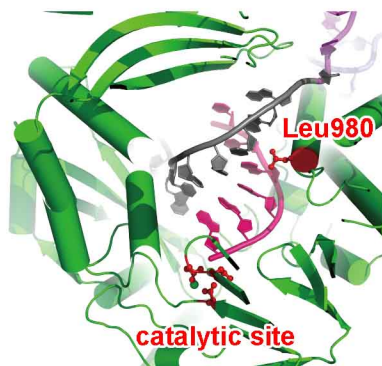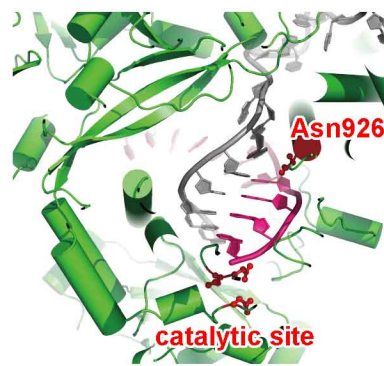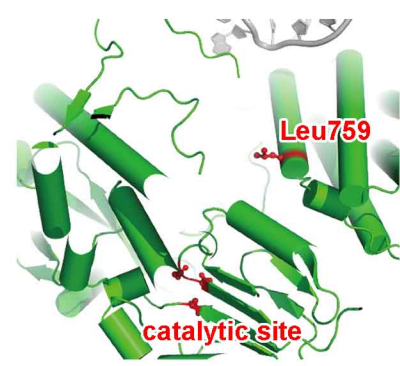

**Supplementary information, Fig. S11 Conservation of zipper-head mechanism in eukaryotes.** **a** Multiple sequence alignment of the thumb-helix-flanking sequence of TERT proteins from various eukaryotes. Positions equivalent to human TERT<sup>Leu980</sup> are highlighted with respective colors. **b** Structural comparison analysis of the active sites in human, *Tetrahymena thermophila* and *Candida albicans* TERT proteins. The three essential aspartate residues in the catalytic centers and the zipper head residues (Leu980 in human TERT, Asn926 in *T. thermophila* TERT and Leu766 in *C. albicans* TERT) are denoted.
