# Supplementary material for: Zipper head mechanism of telomere synthesis by human telomerase
Source: Springer Nature journal article supplement (doi:10.1038/s41422-021-00586-7), 2021-11-15
Supplement: 41422_2021_586_MOESM12_ESM.pdf [file 41422_2021_586_MOESM12_ESM.pdf]

**Supplementary information, Table S1**

**Cryo-EM data collection, refinement and validation statistics.**

|                                                  | Core<br>EMD-31811<br>PDB 7V99 | Histone_masked<br>EMD-31812 | HACA<br>EMD-31813<br>PDB 7V9A | GAR1_masked<br>EMD-31814 |
|--------------------------------------------------|-------------------------------|-----------------------------|-------------------------------|--------------------------|
| <b>Data collection and processing</b>            |                               |                             |                               |                          |
| Magnification                                    | 81,000                        | 81,000                      | 81,000                        | 81,000                   |
| Voltage (kV)                                     | 300                           | 300                         | 300                           | 300                      |
| Electron exposure (e-/Å <sup>2</sup> )           | 62                            | 62                          | 62                            | 62                       |
| Defocus range (µm)                               | -1.5 to -2.8                  | -1.5 to -2.8                | -1.5 to -2.8                  | -1.5 to -2.8             |
| Pixel size (Å)                                   | 1.1                           | 1.1                         | 1.1                           | 1.1                      |
| Symmetry imposed                                 | C1                            | C1                          | C1                            | C1                       |
| Initial particle images (no.)                    | 771,617                       | 771,617                     | 771,617                       | 771,617                  |
| Final particle images (no.)                      | 297,526                       | 50,600                      | 167,923                       | 131,717                  |
| Map resolution (Å)                               | 3.54                          | 4.97                        | 3.94                          | 4.40                     |
| FSC threshold                                    | 0.143                         | 0.143                       | 0.143                         | 0.143                    |
| Map resolution range (Å)                         | 2.8-4.4                       | 3.0-5.0                     | 3.5-7.5                       | 4.4-7.5                  |
| <b>Refinement</b>                                |                               |                             |                               |                          |
| Initial model used (PDB code)                    | 6D6V                          |                             | 3HAY                          |                          |
| Model resolution (Å)                             | 4.80                          |                             | 4.99                          |                          |
| FSC threshold                                    | 0.143                         |                             | n/a                           |                          |
| Model resolution range (Å)                       | n/a                           |                             | n/a                           |                          |
| Map sharpening <i>B</i> factor (Å <sup>2</sup> ) | -57.1                         |                             | -40.3                         |                          |
| Model composition                                |                               |                             |                               |                          |
| Non-hydrogen atoms                               | 14,582                        |                             | 16,876                        |                          |
| Protein residues                                 | 1,170                         |                             | 1,723                         |                          |
| Nucleotide                                       | 249                           |                             | 146                           |                          |
| <i>B</i> factors (Å <sup>2</sup> )               |                               |                             |                               |                          |
| Protein                                          | 59.8                          |                             | 49.7                          |                          |
| Nucleotide                                       | 79.2                          |                             | 65.7                          |                          |
| R.m.s. deviations                                |                               |                             |                               |                          |
| Bond lengths (Å)                                 | 0.002                         |                             | 0.002                         |                          |
| Bond angles (°)                                  | 0.515                         |                             | 0.567                         |                          |
| Validation                                       |                               |                             |                               |                          |
| MolProbity score                                 | 1.83                          |                             | 1.74                          |                          |
| Clashscore                                       | 7.85                          |                             | 6.87                          |                          |
| Poor rotamers (%)                                | 0.10                          |                             | 0.00                          |                          |
| Ramachandran plot                                |                               |                             |                               |                          |
| Favored (%)                                      | 94.06                         |                             | 94.78                         |                          |
| Allowed (%)                                      | 5.85                          |                             | 5.22                          |                          |
| Disallowed (%)                                   | 0.09                          |                             | 0.00                          |                          |
