# Supplementary material for: Zipper head mechanism of telomere synthesis by human telomerase
Source: Springer Nature journal article supplement (doi:10.1038/s41422-021-00586-7), 2021-11-15
Supplement: 41422_2021_586_MOESM14_ESM.pdf [file 41422_2021_586_MOESM14_ESM.pdf]

**Supplementary information, Movie S1 Coupled seesaw-like conformational changes of fingers A and B.** The conformational changes of fingers A and B were derived from principle component analysis (PCA). Proteins and nucleic acids are shown in cylinder and cartoon representations, respectively. Fingers-A and fingers-B are colored in salmon and deep teal, respectively.
